# Supplementary material for: P16INK4a Deletion Ameliorates Damage of Intestinal Epithelial Barrier and Microbial Dysbiosis in a Stress-Induced Premature Senescence Model of Bmi-1 Deficiency
Source: PubMed Central journal article supplement (PMC8545785; doi:10.3389/fcell.2021.671564), 2021-10-07

**Figure S1**

**A.**

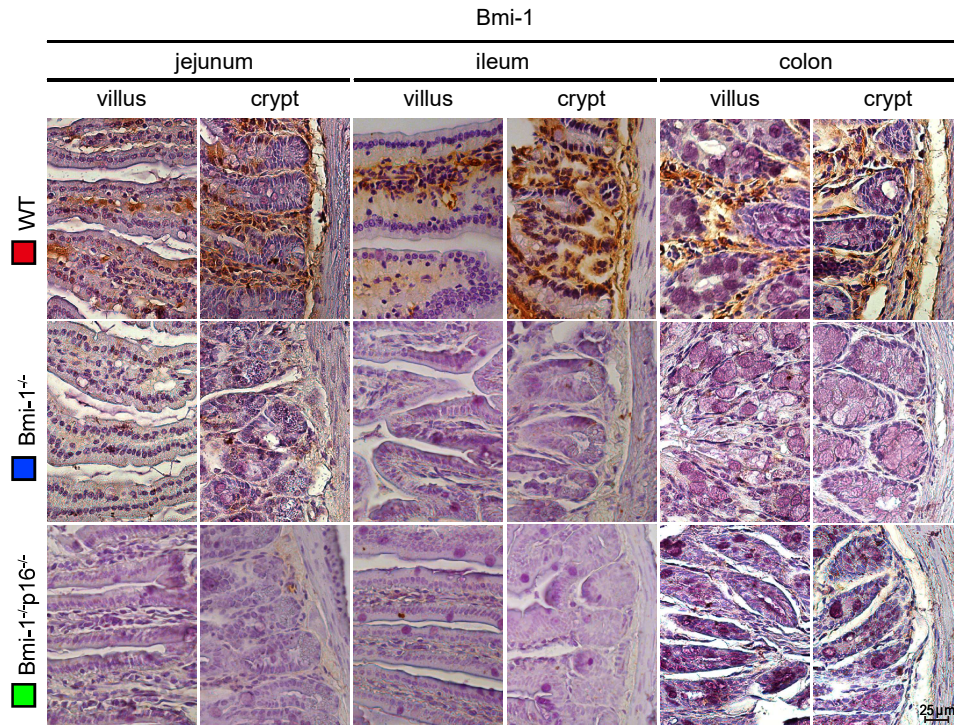

**B.**

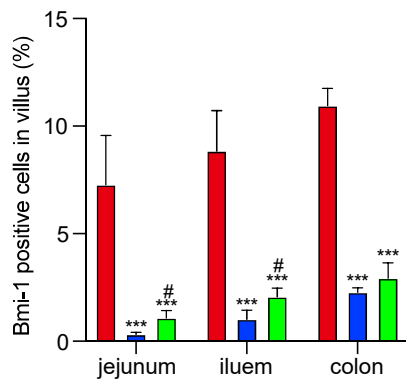

**C.**

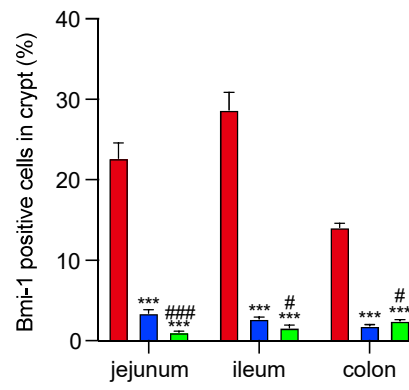

**Figure S2**

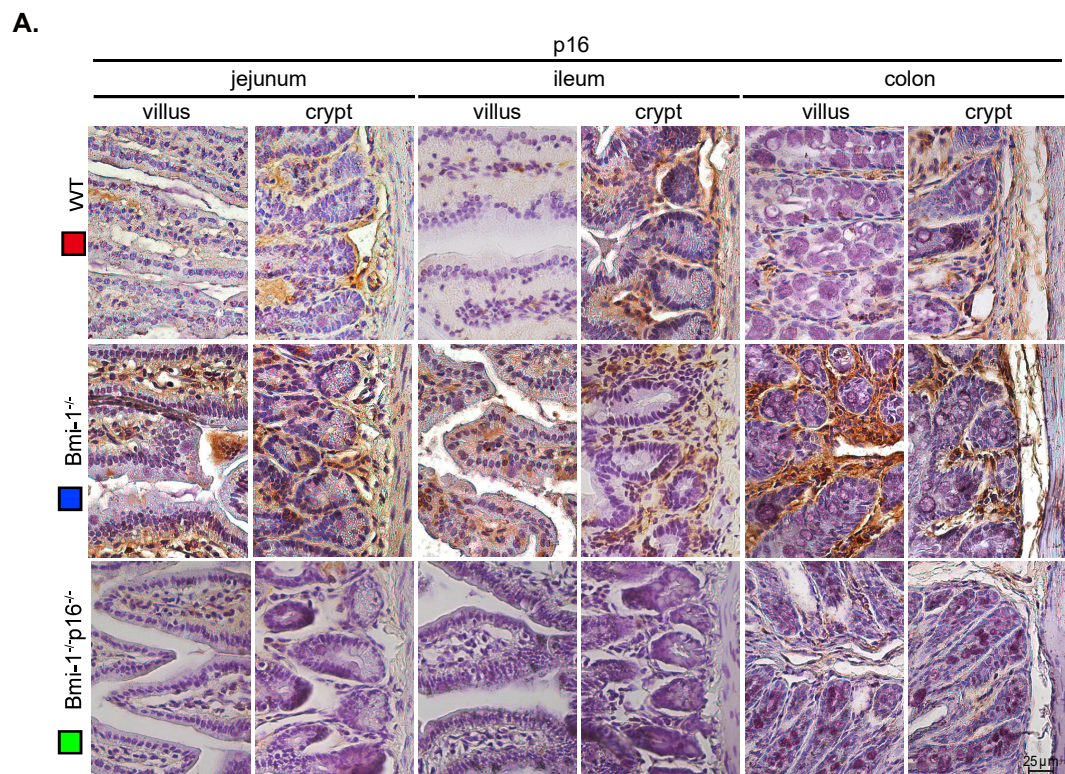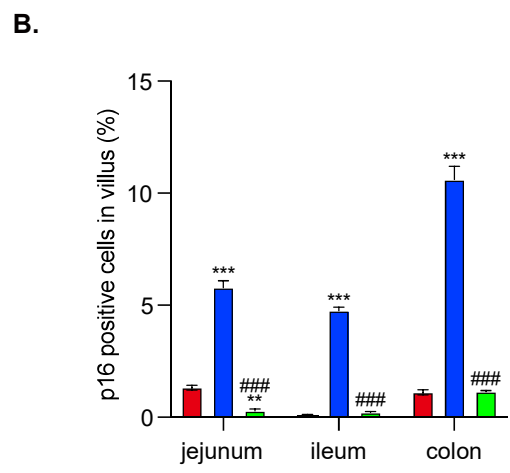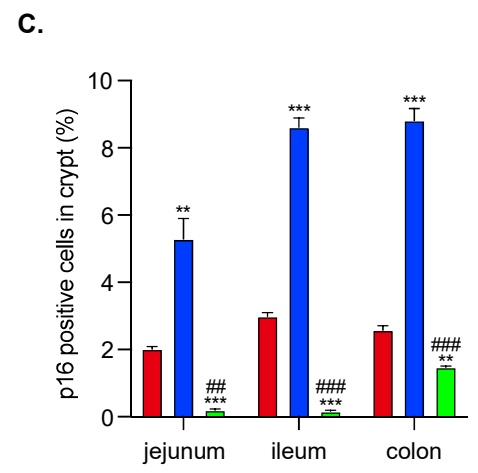

Figure S3

A.

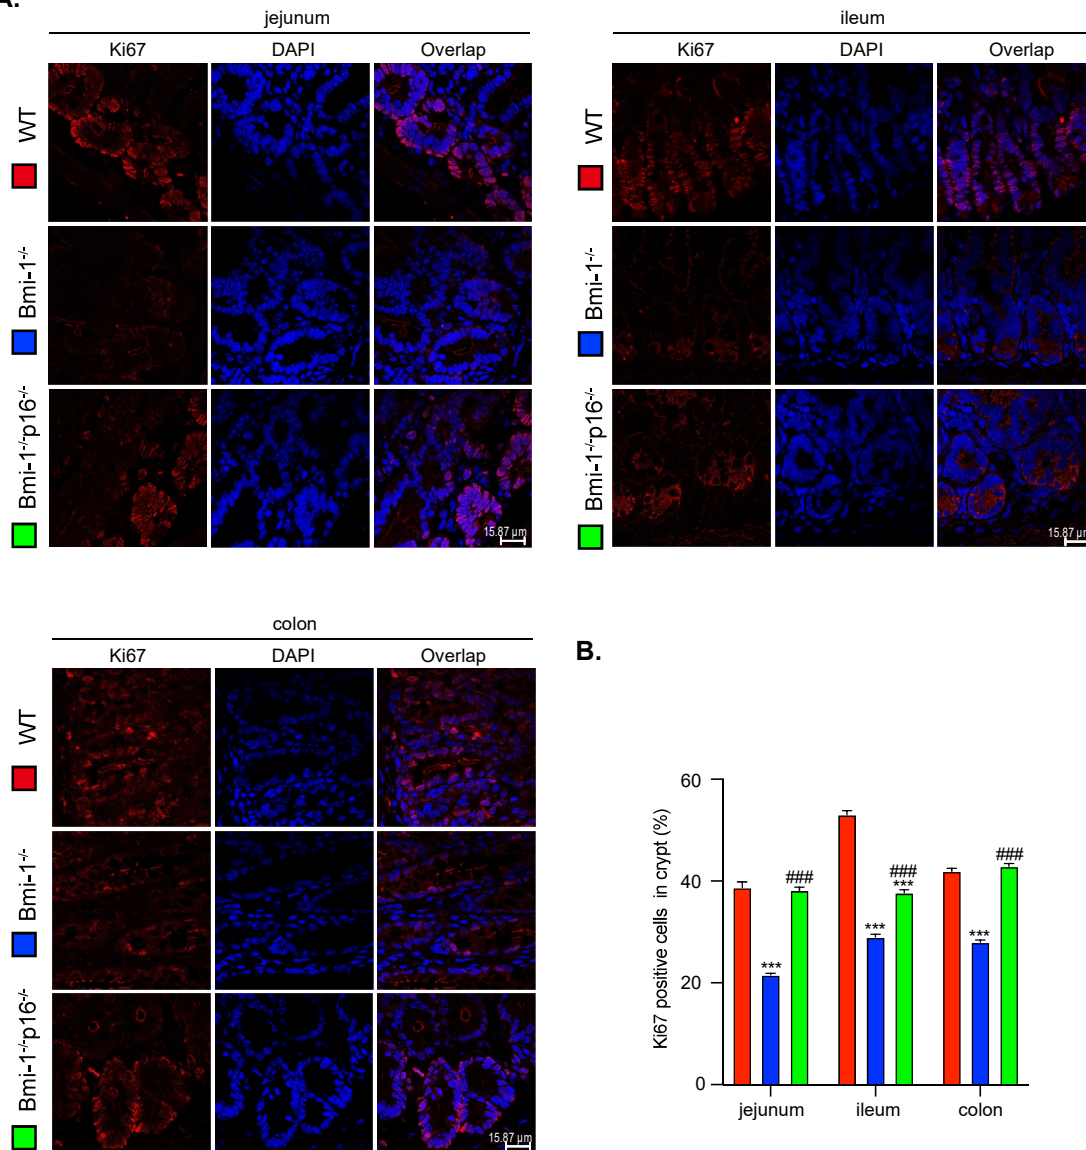

B.

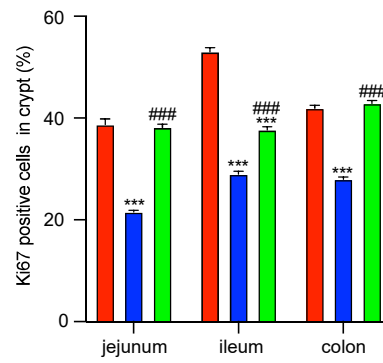

**Figure S4**

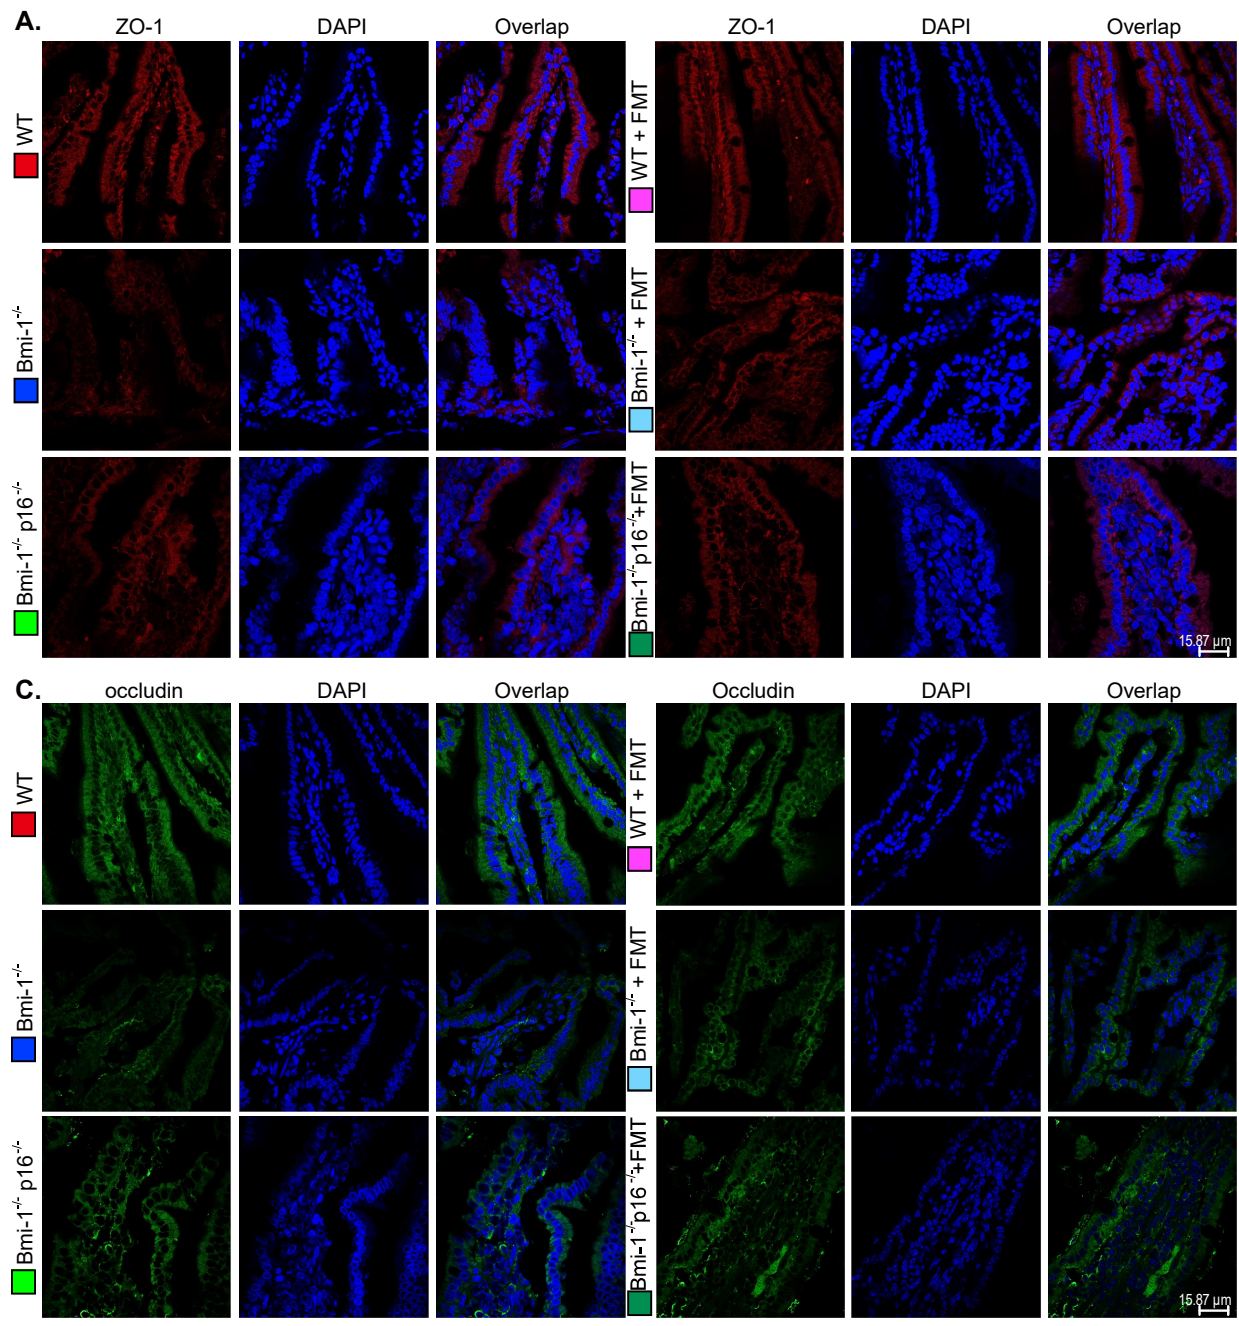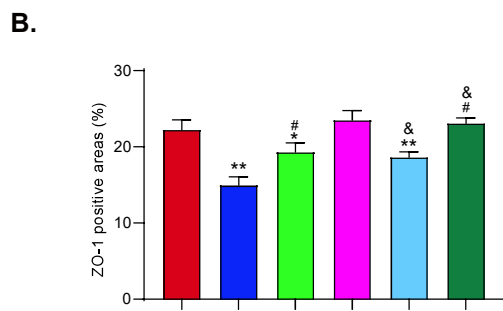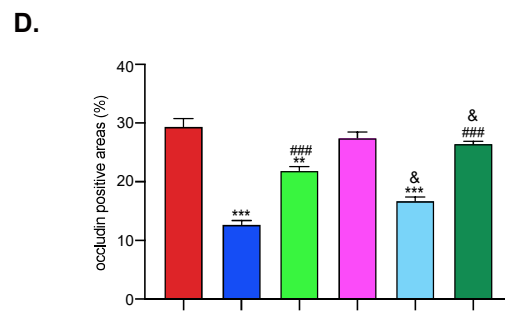

Supplement: Data_Sheet_1.pdf [file Data_Sheet_1.pdf]
